# Supplementary material
Source: PubMed Central journal article supplement (PMC4108521)
Supplement: NIHMS572312-supplement-Supp_FigS1-S4.pdf [file NIHMS572312-supplement-Supp_FigS1-S4.pdf]

## Supplemental Figure 1

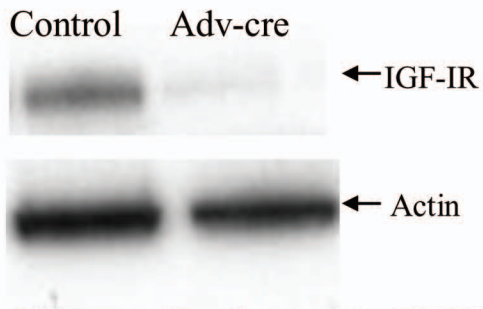

Fig.S1 Western blot showing that IGF-IR was deleted by Adv-cre in the BMSC cultures

# Supplemental Figure 2

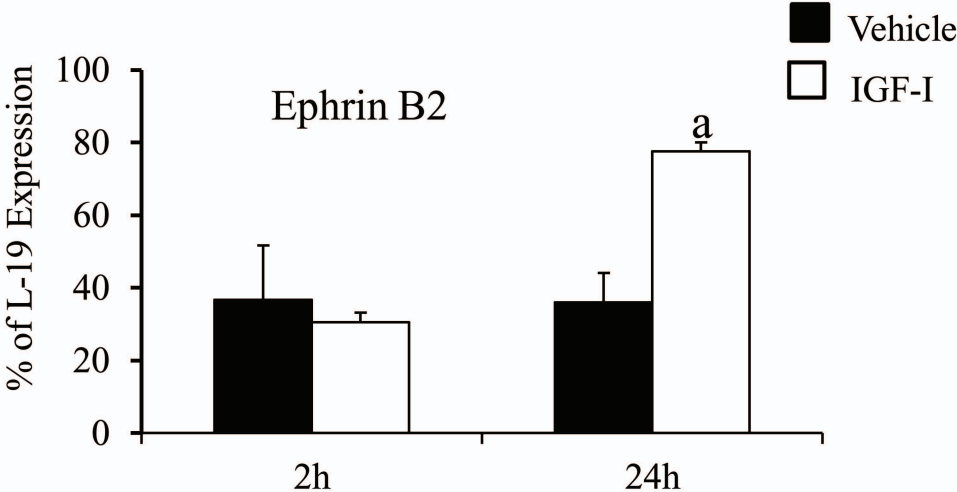

Fig.S2 IGF-I stimulates ephrin B2 production in BMSCs. BMSCs were cultured for 13 days, then treated by IGF-I (10 ng/ml, open bars) or vehicle (solid bars) for 2hrs or 24 hrs. mRNA levels of ephrin B2 were determined by Q-PCR. Results are expressed as percentage of L-19 expression (means  $\pm$  SD ). a:  $p < 0.05$  IGF-I vs. vehicle at the same time point. n = 4 wells in each group.

### Supplemental Figure 3

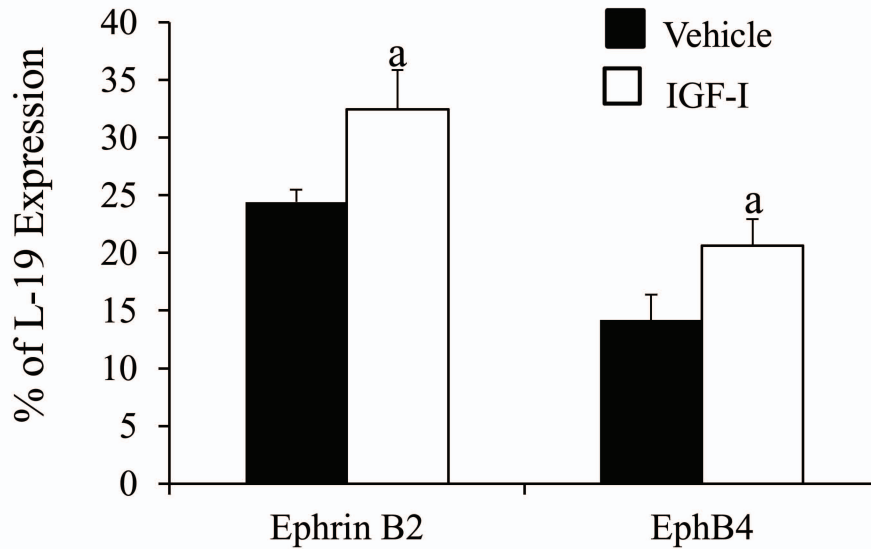

Fig.S3 IGF-I stimulates ephrin B2 and EphB4 expression in ATDC5 cells. ATDC5 cells were treated by IGF-I (10 ng/ml, open bars) or vehicle (solid bars) for 24 hrs. mRNA levels of ephrin B2 and EphB4 were determined by Q-PCR. Results are depicted as percent of L-19 expression (means  $\pm$  SD ). a:  $p < 0.05$  IGF-I vs. vehicle for the same gene. n = 4 wells in each group.

## Supplemental Figure 4

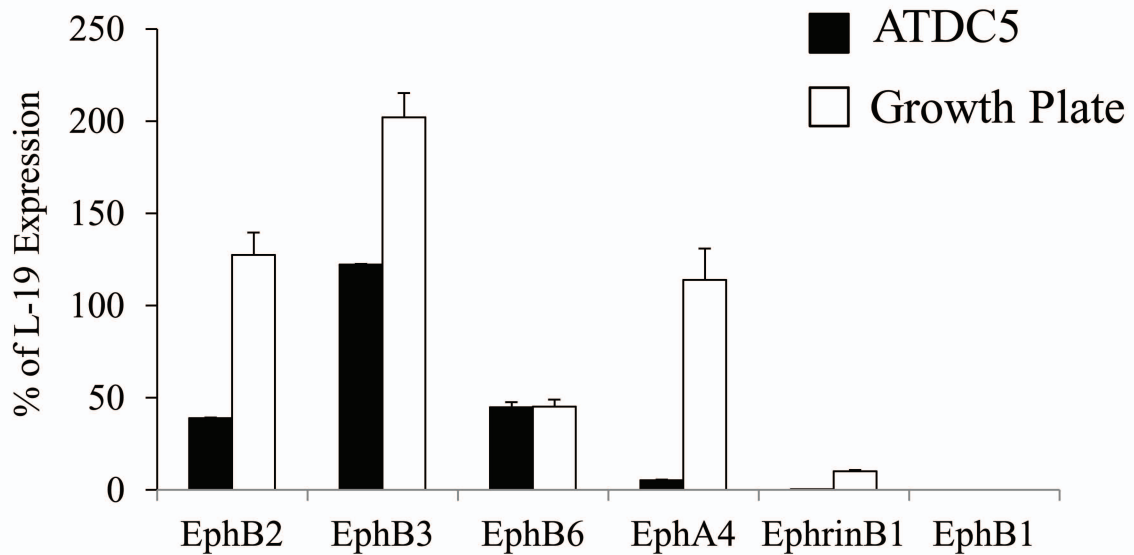

Fig. S4 Expression of ephrin B2 receptors and ephrinB1 in ATDC5 cells and growth plate cartilage.

RNA was isolated from ATDC5 cells (D21, solid bars) and neonatal mouse growth plate (P0, open bars). The mRNA levels of EphB1, B2, B3, B6, EphA4 and Ephrin B1 were determined by Q-PCR. Results are expressed as % of L-19 expression (mean  $\pm$  SD) of triplicate determinations.
